# Supplementary material for: Enhanced mechanical strength and electrical conductivity of carbon-nanotube/TiC hybrid fibers
Source: Royal Society of Chemistry journal article supplement (doi:10.1039/c3nr01857a), 2013-01-01
Supplement: c3nr01857a.pdf [file c3nr01857a.pdf]

# Supplementary Information

## Enhanced Mechanical Strength and Electrical Conductivity of Carbon-Nanotube/TiC Hybrid Fibers

Qinghua Yi,<sup>§a</sup> Xiao Dai,<sup>§a</sup> Jie Zhao,<sup>a</sup> Yinghui Sun,<sup>a</sup> Yanhui Lou,<sup>a</sup> Xiaodong Su,<sup>\*a</sup> Qingwen Li,<sup>b</sup> Baoquan Sun,<sup>a</sup> Honghe Zheng,<sup>a</sup> Mingrong Shen,<sup>a</sup> Qinghua Wang<sup>a</sup> and Guifu Zou<sup>\*a</sup>

<sup>a</sup> Soochow University, Suzhou215006,P.R.China. Fax: +86-512-65228130; Tel: +86-512-65228130; E-mail: [xdsu@suda.edu.cn](mailto:xdsu@suda.edu.cn); [zouguifu@suda.edu.cn](mailto:zouguifu@suda.edu.cn)

<sup>b</sup> Suzhou Institute of Nano-Tech and Nano-Bionics, Chinese Academy of Sciences, Suzhou215123,P.R.China

\*Corresponding author

§Equal contribution

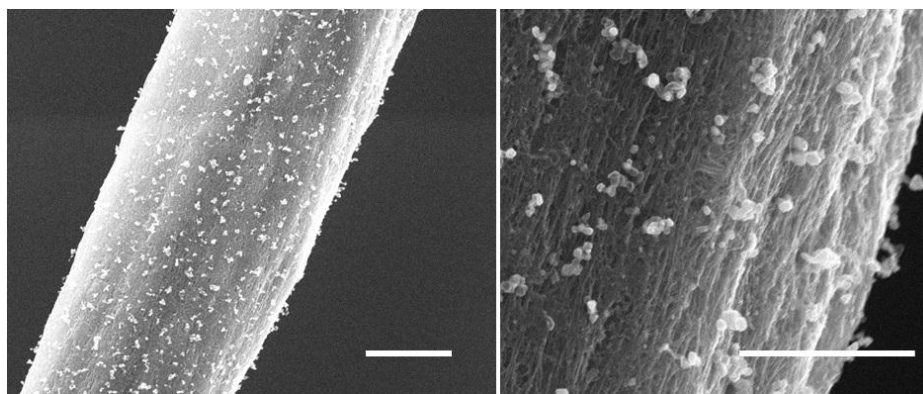

**Fig. S1** High resolution SEM images of CNT/TiC fiber (Scale bar: 2  $\mu\text{m}$ ).

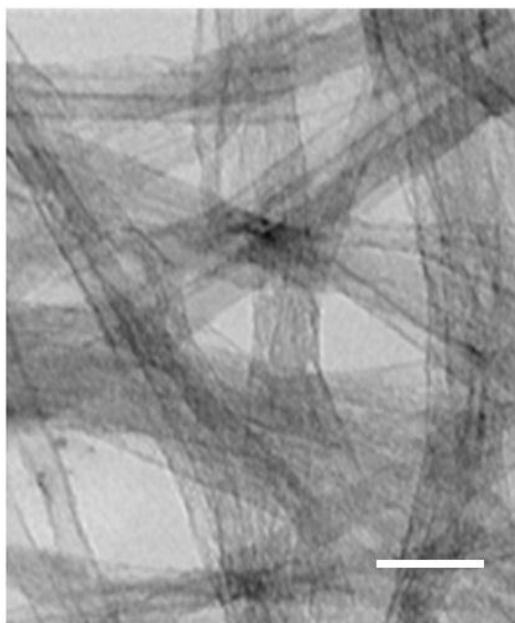

**Fig. S2** TEM images of pure CNT (Scale bar: 40 nm).

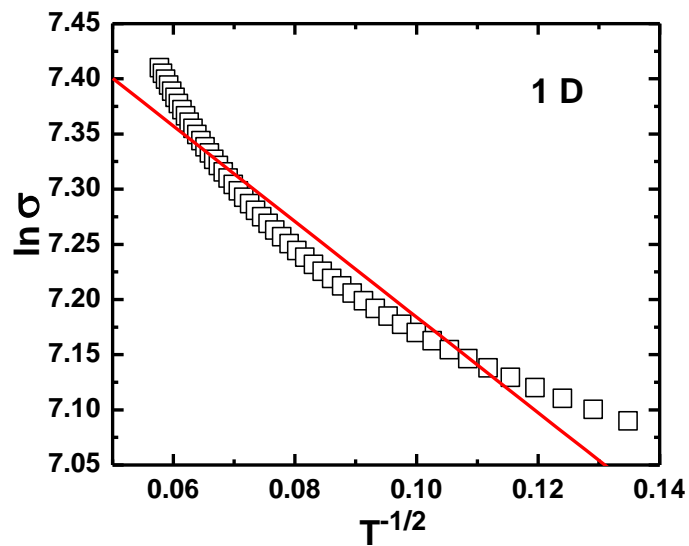

**Fig. S3** The fitting of  $\ln \sigma$  vs.  $T^{-1/2}$  based on the Mott's variable range hopping model:  $\sigma \propto \exp(-A/T^{1/(d+1)})$ , where  $\sigma$  is electrical conductivity,  $A$  is constant,  $T$  is the temperature, and  $d$  is the dimensionality. As this plot,  $d = 1$ , that is one dimensional hopping mechanism.

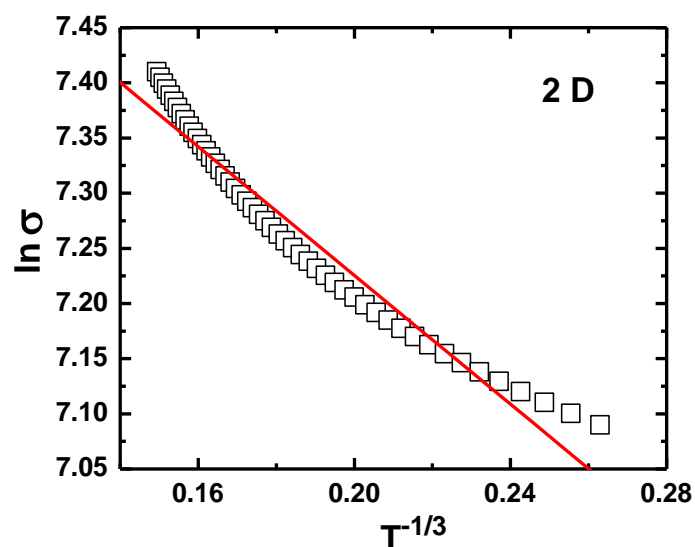

**Fig. S4** The fitting of  $\ln \sigma$  vs.  $T^{-1/3}$  based on the Mott's variable range hopping model:  $\sigma \propto \exp(-A/T^{1/(d+1)})$ , where  $\sigma$  is electrical conductivity,  $A$  is constant,  $T$  is the temperature, and  $d$  is the dimensionality. As this plot,  $d = 2$ , that is one dimensional hopping mechanism.

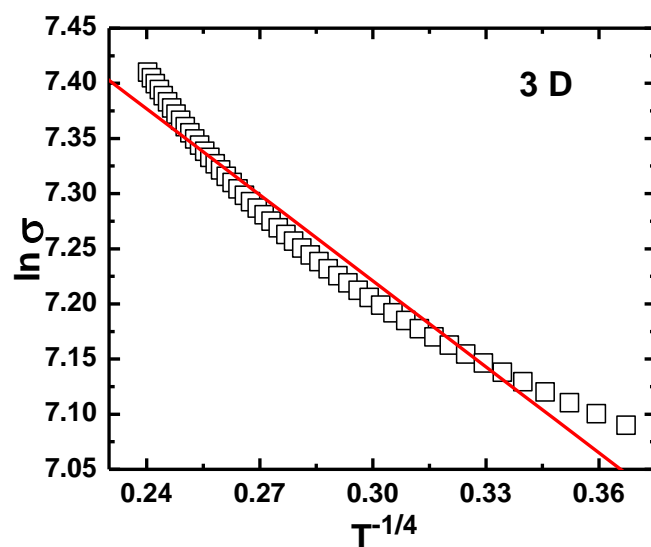

**Fig. S5** The fitting of  $\ln \sigma$  vs.  $T^{-1/4}$  based on the Mott's variable range hopping model:  $\sigma \propto \exp(-A/T^{1/(d+1)})$ , where  $\sigma$  is electrical conductivity,  $A$  is constant,  $T$  is the temperature, and  $d$  is the dimensionality. As this plot,  $d = 3$ , that is one dimensional hopping mechanism.
